Development 138, 1875 (2011) doi:10.1242/dev.067231  
© 2011. Published by The Company of Biologists Ltd

## Regulation of hematopoietic cell clusters in the placental niche through SCF/Kit signaling in embryonic mouse

**Tatsuya Sasaki\*, Chiyo Mizuochi\*, Yuka Horio, Kazuki Nakao, Koichi Akashi and Daisuke Sugiyama†**

\*These authors contributed equally to this work

†Author for correspondence (ds-mons@yb3.so-net.ne.jp)

There was an error published in *Development* **137**, 3941-3952.

The email address of the corresponding author was linked to the incorrect name in the author list. The corrected linking appears above.

The authors apologise to readers for this mistake.
